# Supplementary material for: Self-assembled ultrathin titania nanosheets as blocking layers for significantly enhanced photocurrent and photovoltage of dye-sensitized solar cells
Source: Royal Society of Chemistry journal article supplement (doi:10.1039/c5ta04877j), 2015-01-01
Supplement: c5ta04877j1.pdf [file c5ta04877j1.pdf]

## Electronic Supplementary Information

### Self-Assembled Ultrathin Titania Nanosheets as Blocking Layers for Significantly Enhanced Photocurrent and Photovoltage of Dye- Sensitized Solar Cells

Lu Zhang,<sup>1</sup> Hong Sun,<sup>1</sup> Zhaosheng Xue,<sup>2</sup> Bin Liu,<sup>2,3</sup> Zhong-Sheng Wang<sup>1,\*</sup>

<sup>1</sup> Department of Chemistry, Lab of Advanced materials, iChEM (Collaborative Innovation Center of Chemistry for Energy Materials), Fudan University, 2205 Songhu Road, Shanghai 200438, P. R. China

<sup>2</sup> Department of Chemical and Biomolecular Engineering, National University of Singapore, Singapore 117576, Singapore

<sup>3</sup> Institute of Materials Research Engineering (A\*STAR), 3 Research Link, Singapore 117602, Singapore

\* Corresponding author, E-mail: zs.wang@fudan.edu.cn, Tel/Fax: +86-21-51630345

**Characterizations.** The morphologies of the titania nanosheets were observed on high-resolution transmission electron microscope (TEM, JEM-2100F, JEOL) and field-emitting scanning electron microscope (FESEM, S-4800, Hitachi, Japan). The thickness of the blocking layer is estimated with FESEM. X-ray diffraction (XRD) was performed on D8 Advance (Bruker, Cu K $\alpha$  radiation:  $\lambda = 0.154$  nm). The film thickness was measured using a surface profiler (Veeco Dektak 150, USA). The UV-vis spectra were recorded on Shimadzu UV-2550 UV-vis spectrometer. An electrochemical workstation (ZAHNER ZENNIUM CIMPS-1, Germany) was used to perform intensity modulated photocurrent/photovoltage spectroscopy (IMPS/IMVS) and charge extraction under illumination of white light from a light emitting diode (LED). The intensity-modulated spectra were measured at room temperature with light intensity ranging from 10 to 120 W m<sup>-2</sup> in modulation frequency ranging from 0.1 Hz to 10 kHz with modulation amplitude less than 5% of the light intensity. A Keithley-2420 source meter in combination with a Sol3A class AAA solar simulator IEC/JIS/ASTM equipped with an AM1.5G filter and a 450 W Xenon lamp was used to measure the current-voltage curves of solar cells. The intensity of light was calibrated with a reference silicon solar cell (Oriel-91150). To avoid stray light, a black mask with an aperture area of 0.2304 cm<sup>2</sup> was put on the surface of devices during measurements.

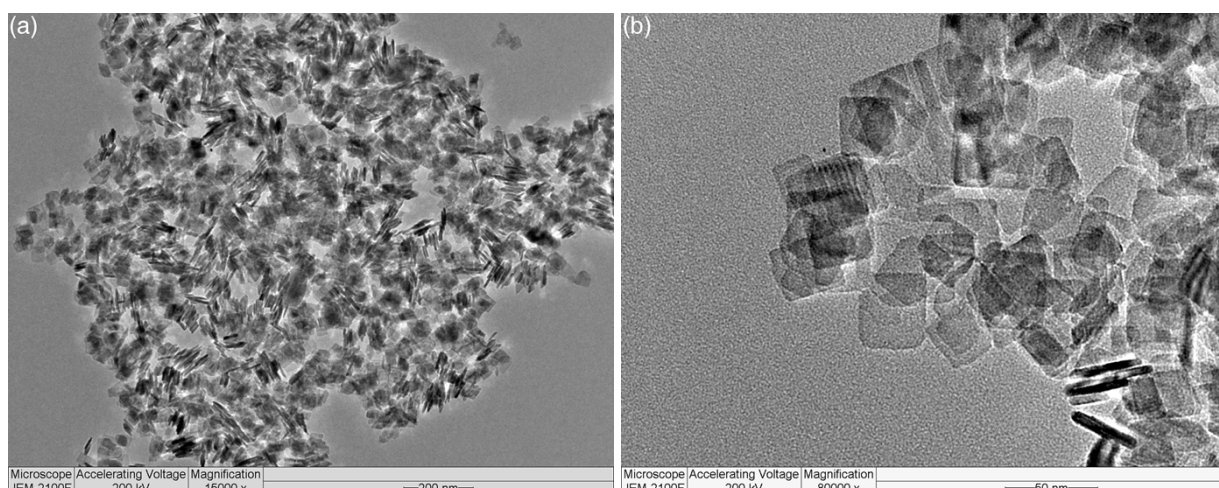

**Figure S1.** TEM images of the titania nanosheets with different magnifications

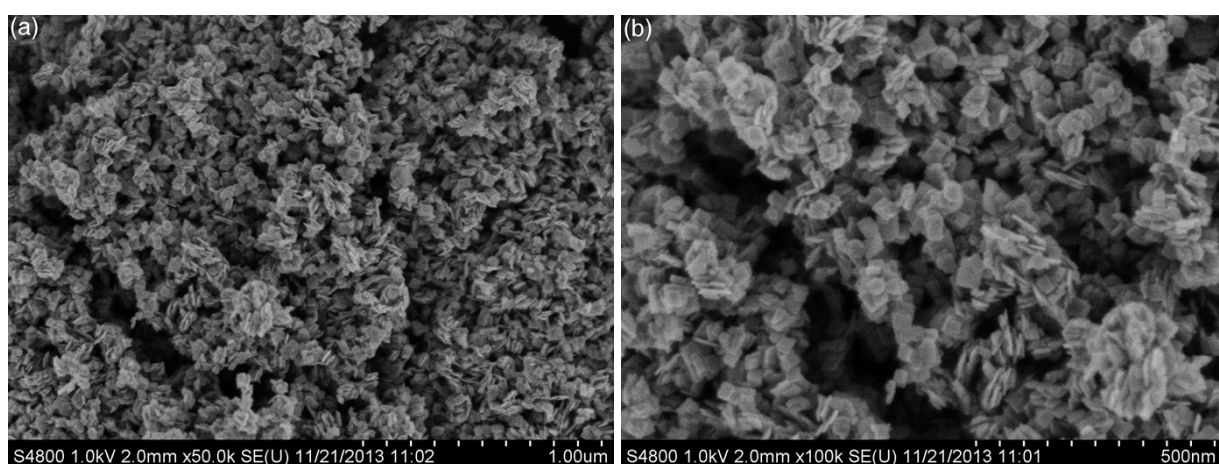

**Figure S2.** SEM images of the titania nanosheet powder with different magnifications

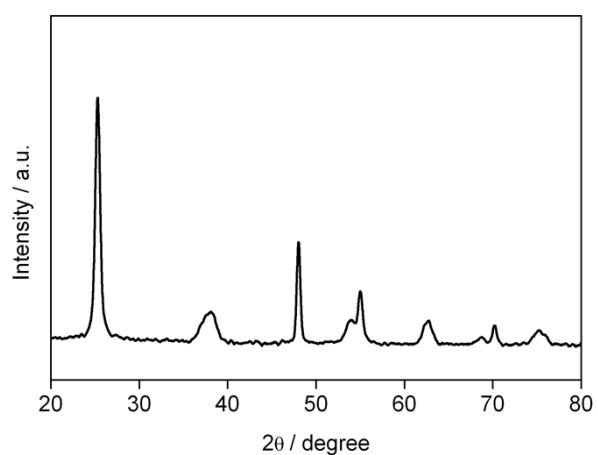

**Figure S3.** XRD spectrum of the titania nanosheets

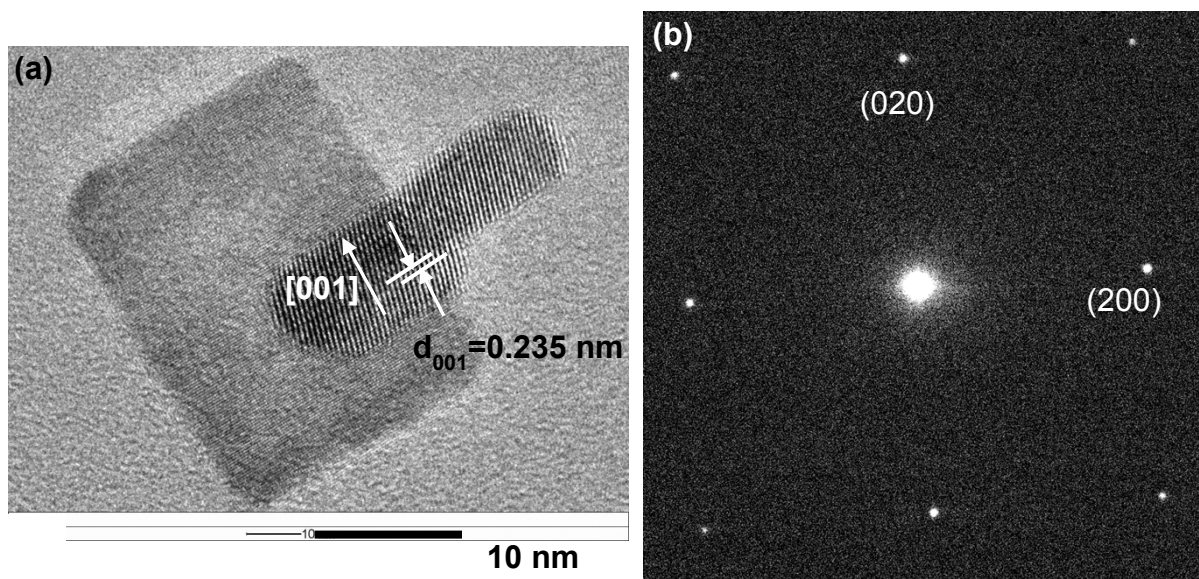

**Figure S4.** (a) High-resolution TEM image of an individual vertical nanosheet and (b) the corresponding SAED pattern.

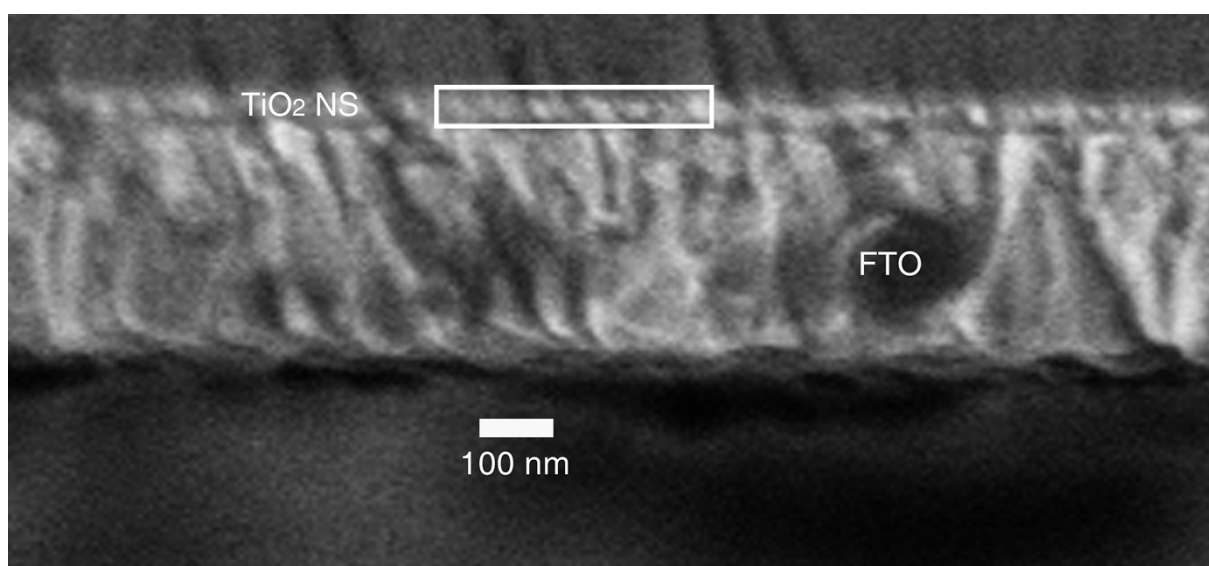

**Figure S5.** Magnified cross-section SEM image of the 10-layer nanosheet film.

**Table S1.** Sheet resistance of FTO with and without a blocking layer

|                                                       | Sheet resistance ( $\Omega/\text{square}$ ) |
|-------------------------------------------------------|---------------------------------------------|
| FTO                                                   | 14                                          |
| FTO/1-layer-NS                                        | 30                                          |
| FTO/2-layer-NS                                        | 35                                          |
| FTO/5-layer-NS                                        | 45                                          |
| FTO/10-layer-NS                                       | 60                                          |
| FTO/pyrolyzed $\text{TiO}_2$ ( $\sim 50 \text{ nm}$ ) | 55                                          |
